# Supplementary material
Source: publisher site journal article supplement (https://www.dovepress.com/article/336324)
Supplement: Supplementary file 1 [file get_supplementary_file.php]

Supplemental Table 1: Variables included in the propensity score estimation

| **Variables** **assessed in the 12-month baseline period that were considered in the PSM** |
| --- |
| Age at index date |
| Gender |
| Charlson Comorbidity Index |
| CHA2DS2-VASc Score |
| Top 5 most frequently observed comorbidities that are not covered by the CCI/CHA2DS2-VASc (each comorbidity as separate variable) |
| Level of care |
| Number of prescribed medications (counting each agent – ATC code level 5 – with at least two prescriptions) |
| Number of GP visits |
| Number of specialist visits |
| Use of antihypertensive agents (Y/N; ATC codes C02-, C03-, C07-C09-, C10BX-, C06A- with at least two prescriptions) |
| Use of oral antidiabetic agents (Y/N; ATC codes A10B-, A10X- with at least two prescriptions) |
| Use of insulin (Y/N; ATC codes A10A- with at least two prescriptions ) |
| Use of antiarrhythmic agents (Y/N; ATC codes C08-, C01B-, C07A- with at least two prescriptions) |
| Use of nonsteroidal anti-inflammatory drugs (Y/N; ATC codes M01-, N02- with at least two prescriptions) |
| Use of antiplatelets (Y/N; ATC codes B01AC- with at least two prescriptions) |
| Use of lipid lowering agents (Y/N; ATC codes C10- with at least two prescriptions) |
| Use of drugs for peptic ulcer and GORD (Y/N; ATC codes A02B- with at least two prescriptions) |
| Use of cardiac glycosides (Y/N; ATC codes C01A- with at least two prescriptions) |
| Use of oral corticosteroids (Y/N; ATC codes H02- with at least two prescriptions) |
| Use of benzodiazepine derivatives (Y/N; ATC codes N03AE-, N05BA-, N05CD-, N05CF- with at least two prescriptions) |
| Adherence related to cardiovascular medications (ACT code C*) in the 12-month pre-index period (weighted prescription-based Medication Possession Ratio (MPR)) |
| Number of documented inpatient days |
| Number of hospitalizations with any cardiovascular diagnosis as main diagnosis |
| Number of hospitalizations with any non-cardiovascular diagnosis as main diagnosis |
| Participation in a disease management program (DMP) |
| Confirmed diagnosis of dementia (ICD-10 code: F00-F05, G30) |
| Confirmed diagnosis of affective disorders (ICD-10 code: F30-F39) |
| Confirmed mental and behavioral disorders due to psychoactive substance/alcohol use (ICD-10 code: F10-F19) |
